# Supplementary material for: Determinants of SARS-CoV-2 Infection in the Older Adult Population: Data from the LOST in Lombardia Study
Source: MDPI journal article supplement (doi:10.3390/vaccines10070989), 2022-06-22
Supplement: s1 [file s1]

**Supplementary Table S1:** Distribution of 4400 Italian subjects aged 65 years or more according to COVID-19 infection and type of diagnosis, overall and by sex and age. LOST IN LOMBARDIA, 2020.

| Characteristics             | Total       | Sex         |             | Age         |            |             |            |            |
|-----------------------------|-------------|-------------|-------------|-------------|------------|-------------|------------|------------|
|                             |             | Men         | Women       | 65-69       | 70-74      | 75-79       | 80-84      | 85+        |
| Total                       | 4400 (100)  | 1902 (100)  | 2498 (100)  | 1289 (100)  | 838 (100)  | 1188 (100)  | 739 (100)  | 346 (100)  |
| COVID-19                    |             |             |             |             |            |             |            |            |
| No                          | 4187 (95.2) | 1807 (95.0) | 2379 (95.3) | 1195 (92.7) | 811 (96.8) | 1136 (95.7) | 707 (95.6) | 338 (97.7) |
| Yes                         | 213 (4.9)   | 95 (5.0)    | 119 (4.8)   | 94 (7.3)    | 27 (3.2)   | 51 (4.3)    | 33 (4.4)   | 8 (2.3)    |
| Type of diagnosis*          |             |             |             |             |            |             |            |            |
| Swab                        | 98 (45.8)   | 49 (51.4)   | 49 (41.3)   | 46 (49.1)   | 15 (53.9)  | 18 (35.9)   | 15 (46.8)  | 3 (38.3)   |
| Serological test            | 46 (21.6)   | 18 (19.5)   | 28 (23.3)   | 24 (25.5)   | 4 (15.7)   | 14 (26.9)   | 4 (12.0)   | 0 (0.0)    |
| No diagnosis, symptoms only | 70 (32.7)   | 28 (29.1)   | 42 (35.5)   | 24 (25.4)   | 8 (30.5)   | 19 (37.2)   | 14 (41.2)  | 5 (61.7)   |

\*on subjects with COVID-19
